# Supplementary material
Source: ML conference proceedings conference paper supplement (https://openreview.net/forum?id=djbC2A4uTHP)
Supplement: supplementary_material [file attachment]

## A Appendix

### A.1 Additional FoldingNet interpolations

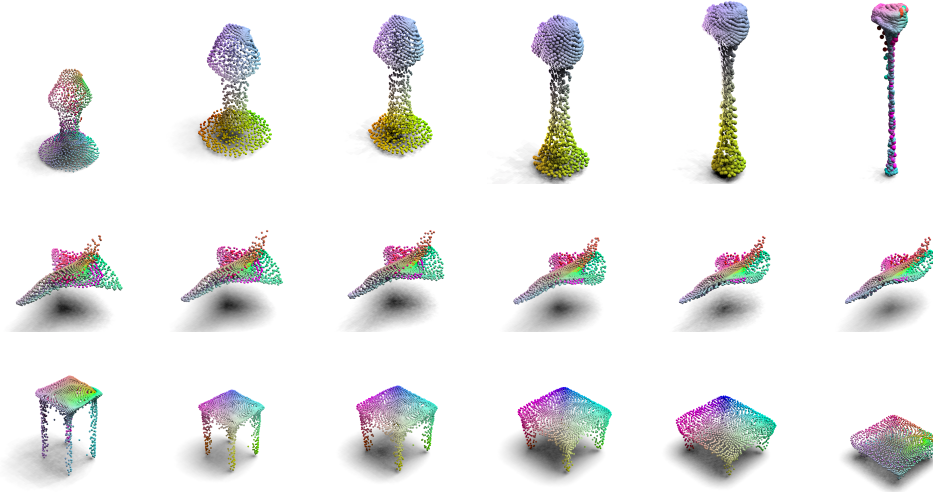

**Figure 3:** Interpolation between two samples of a lamp, airplane and table using a baseline FoldingNet trained on the ShapeNet dataset. Compared to CR-FoldingNet, the baseline latent space is less smooth and many of the points in the generated points clouds are not in the strict structure of the desired objects leading to worse reconstruction and interpolations.
